# Supplementary material for: Associations between HIV and Human Pathways Revealed by Protein-Protein Interactions and Correlated Gene Expression Profiles
Source: PLoS One. 2012 Mar 27;7(3):e34240. doi: 10.1371/journal.pone.0034240 (PMC3313983; doi:10.1371/journal.pone.0034240)
Supplement: Table S1 — Rankings of KEGG Pathways by various approaches and rank combination. Detailed information for the constructions of rankings by the four approaches and rank combination are included. For each approach, the means, standard deviations, z-statistics, p-values and ranks are provided. Ranks are based on z-statistics. The 220 KEGG pathways were sorted by combined ranks. (XLS) [file pone.0034240.s001.xls]

## Sheet: Table S1
Table S1. Rankings of KEGG Pathways by various approaches and rank combination.
					Common Genes							Recovered Interactions							Co-Expressed Genes							Common Interaction Partners							Rank Combination
Pathway Number	Pathway Title	KEGG Pathway Category	# of Genes in Pathway		# of Common Genes	Mean	SD	z-stat	p-value	Rank		# of Interactions	Mean	SD	z-stat	p-value	Rank		# of Co-Expressed Genes	Mean	SD	z-stat	p-value	Rank		# of Common Interactors	Mean	SD	z-stat	p-value	Rank		Rank
5212	Pancreatic cancer	Human Diseases	71		3	0.132	0.361534	7.93287	1.07071e-15	1		6	0.219	0.836504	6.91091	2.40783e-12	6		5	1.117	1.01209	3.8366	6.23752e-05	8		380	123.805	33.8629	7.56566	1.92957e-14	1		1
4660	T cell receptor signaling pathway	Organismal Systems	108		3	0.199	0.444518	6.3012	1.47673e-10	3		11	0.322	0.993631	10.7464	3.07966e-27	1		10	1.726	1.34191	6.16583	3.50562e-10	2		372	164.044	35.1762	5.91184	1.69156e-09	12		2
5221	Acute myeloid leukemia	Human Diseases	60		2	0.112	0.324902	5.81098	3.10548e-09	4		5	0.17	0.685251	7.04851	9.04236e-13	3		4	0.97	0.952895	3.17979	0.000736921	16		355	108.887	32.8724	7.48693	3.52528e-14	2		3
4662	B cell receptor signaling pathway	Organismal Systems	75		2	0.132	0.355953	5.24788	7.69295e-08	9		5	0.205	0.78204	6.1314	4.35546e-10	8		5	1.216	1.05188	3.59737	0.000160725	11		349	126.756	32.4853	6.84137	3.92202e-12	5		4
5222	Small cell lung cancer	Human Diseases	84		2	0.146	0.385789	4.80574	7.70897e-07	12		5	0.233	0.80831	5.89749	1.84533e-09	9		6	1.324	1.13062	4.13578	1.76873e-05	7		355	139.489	34.8986	6.17535	3.30076e-10	9		5
5220	Chronic myeloid leukemia	Human Diseases	73		2	0.145	0.376984	4.92063	4.3133e-07	11		5	0.251	0.908198	5.22904	8.51984e-08	11		5	1.174	1.09404	3.49713	0.000235143	13		372	125.1	33.0601	7.46821	4.06452e-14	3		6
4920	Adipocytokine signaling pathway	Organismal Systems	67		2	0.11	0.328646	5.75087	4.43917e-09	5		5	0.176	0.696785	6.92322	2.20738e-12	5		4	1.034	0.99591	2.97818	0.00144982	23		357	118.334	33.0838	7.21399	2.71672e-13	4		7
4620	Toll-like receptor signaling pathway	Organismal Systems	102		2	0.178	0.422486	4.31257	8.06846e-06	16		5	0.275	0.912254	5.17948	1.11253e-07	13		6	1.594	1.24125	3.54964	0.000192876	12		352	157.421	33.105	5.87763	2.08091e-09	13		8
4062	Chemokine signaling pathway	Organismal Systems	190		3	0.33	0.565172	4.72423	1.15497e-06	13		8	0.565	1.38191	5.38022	3.71972e-08	10		12	2.998	1.6837	5.34657	4.48178e-08	3		364	228.434	30.6188	4.42754	4.76568e-06	27		9.5
4210	Apoptosis	Cellular Processes	89		2	0.161	0.391449	4.69793	1.31405e-06	14		5	0.274	0.912006	5.18198	1.09771e-07	12		5	1.349	1.15001	3.17476	0.000749811	17		351	144.04	34.9937	5.9142	1.66743e-09	11		9.5
5142	Chagas disease	Human Diseases	104		2	0.216	0.444456	4.01389	2.98629e-05	17		5	0.321	0.931035	5.02559	2.50943e-07	17		6	1.644	1.3111	3.3224	0.000446231	15		359	161.761	33.6358	5.86396	2.25978e-09	14		11
5223	Non-small cell lung cancer	Human Diseases	54		1	0.115	0.337474	2.62242	0.00436536	28		3	0.199	0.830716	3.37179	0.000373407	29		4	0.819	0.872353	3.64646	0.000132939	10		309	99.42	32.6935	6.41044	7.25482e-11	7		12
5215	Prostate cancer	Human Diseases	89		2	0.163	0.403229	4.55572	2.61027e-06	15		5	0.275	0.926409	5.10034	1.69522e-07	14		4	1.392	1.1652	2.23824	0.0126027	33		368	145.547	33.3515	6.66996	1.2794e-11	6		13
5160	Hepatitis C	Human Diseases	134		3	0.242	0.491607	5.61017	1.01064e-08	7		6	0.379	1.10389	5.09198	1.77168e-07	15		6	2.126	1.46091	2.65177	0.00400353	29		375	187.735	32.7278	5.72189	5.2674e-09	16		14
4622	RIG-I-like receptor signaling pathway	Organismal Systems	71		2	0.141	0.375846	4.94617	3.78432e-07	10		3	0.25	0.926476	2.96824	0.00149757	34		6	1.143	1.0496	4.62749	1.85059e-06	4		260	122.201	34.5696	3.98613	3.35796e-05	31		15
5120	Epithelial cell signaling in Helicobacter pylori infection	Human Diseases	68		1	0.119	0.336083	2.62137	0.0043788	29		2	0.195	0.746681	2.41736	0.00781668	41		5	1.09	1.04355	3.74684	8.95385e-05	9		304	117.733	34.0163	5.47582	2.17745e-08	19		16
5145	Toxoplasmosis	Human Diseases	134		3	0.25	0.487584	5.64006	8.49961e-09	6		6	0.426	1.1401	4.88905	5.06612e-07	19		5	2.117	1.39974	2.05967	0.0197151	38		362	188.462	31.5044	5.50838	1.81076e-08	18		17
4623	Cytosolic DNA-sensing pathway	Organismal Systems	56		1	0.1	0.331828	2.71224	0.00334146	26		2	0.183	0.830783	2.18709	0.0143679	46		5	0.879	0.921525	4.47194	3.87574e-06	5		208	102.091	32.7193	3.2369	0.000604188	39		18
5140	Leishmaniasis	Human Diseases	74		2	0.127	0.342035	5.47605	2.17467e-08	8		3	0.204	0.809345	3.45465	0.000275508	27		3	1.176	1.08453	1.68184	0.0463001	44		290	127.074	33.2333	4.90249	4.73156e-07	24		19
5340	Primary immunodeficiency	Human Diseases	35		1	0.057	0.248622	3.79291	7.44463e-05	19		6	0.085	0.565769	10.4548	6.96548e-26	2		3	0.589	0.769852	3.13177	0.000868774	18		128	69.763	30.7544	1.89362	0.0291379	61		20
5213	Endometrial cancer	Human Diseases	52		1	0.102	0.325118	2.76207	0.00287177	25		3	0.173	0.740013	3.82021	6.66703e-05	23		2	0.85	0.925395	1.24271	0.106987	52		300	98.041	32.8867	6.14105	4.09877e-10	10		21
4621	NOD-like receptor signaling pathway	Organismal Systems	62		1	0.114	0.356555	2.48489	0.00647951	32		2	0.176	0.73455	2.48315	0.00651125	40		4	1.005	0.999987	2.99504	0.00137206	22		265	111.607	33.9468	4.51863	3.112e-06	26		22
5131	Shigellosis	Human Diseases	64		1	0.129	0.352822	2.46867	0.00678089	33		2	0.206	0.753745	2.38011	0.00865364	43		4	0.968	1.03636	2.92561	0.00171889	25		292	115.864	35.2238	5.00048	2.85941e-07	22		23
5200	Pathways in cancer	Human Diseases	328		3	0.6	0.791598	3.03184	0.00121532	24		6	1.015	1.78043	2.79988	0.00255609	36		12	5.145	2.2147	3.09523	0.000983294	20		374	290.653	26.2556	3.17444	0.000750621	40		24
5210	Colorectal cancer	Human Diseases	63		1	0.117	0.342678	2.57676	0.00498655	30		3	0.195	0.773028	3.62859	0.000142488	25		2	0.996	0.984354	1.01996	0.153874	56		307	112.369	33.6165	5.78975	3.52464e-09	15		25
4722	Neurotrophin signaling pathway	Organismal Systems	127		2	0.218	0.44797	3.97795	3.47561e-05	18		5	0.379	1.09204	4.23153	1.16054e-05	21		3	2.008	1.39567	0.710772	0.238613	64		363	182.248	32.0532	5.63913	8.54559e-09	17		26
4012	ErbB signaling pathway	Environmental Information Processing	87		1	0.159	0.399849	2.1033	0.0177199	42		3	0.227	0.792527	3.49893	0.000233561	26		3	1.36	1.11159	1.47536	0.0700576	48		306	140.619	33.8073	4.89187	4.99423e-07	25		27
5214	Glioma	Human Diseases	65		1	0.113	0.332177	2.67027	0.00378956	27		3	0.183	0.743009	3.79134	7.49189e-05	24		1	1.075	1.00119	-0.074911	0.529857	86		308	113.023	31.4988	6.18999	3.00845e-10	8		28
4914	Progesterone-mediated oocyte maturation	Organismal Systems	88		1	0.15	0.379003	2.24272	0.0124573	38		3	0.255	0.903765	3.03729	0.00119357	31		3	1.44	1.12946	1.38119	0.0836098	50		269	142.36	33.8122	3.7454	9.00549e-05	35		29
4010	MAPK signaling pathway	Environmental Information Processing	268		2	0.524	0.694194	2.12621	0.0167431	40		5	0.892	1.64653	2.49495	0.00629874	39		8	4.271	2.06878	1.80251	0.0357323	42		357	269.006	28.6516	3.07117	0.00106612	41		31
4150	mTOR signaling pathway	Environmental Information Processing	52		1	0.077	0.277756	3.32307	0.000445169	20		3	0.112	0.57427	5.029	2.46528e-07	16		1	0.803	0.899444	0.219024	0.413316	79		233	95.717	32.1413	4.27123	9.71999e-06	29		31
4370	VEGF signaling pathway	Environmental Information Processing	76		1	0.12	0.351744	2.50182	0.00617782	31		3	0.203	0.813912	3.43649	0.000294655	28		2	1.174	1.06811	0.773327	0.219665	63		257	127.545	32.7207	3.95636	3.80503e-05	32		31
4630	Jak-STAT signaling pathway	Environmental Information Processing	155		2	0.296	0.520245	3.27538	0.000527598	22		4	0.466	1.18923	2.97168	0.00148087	33		4	2.497	1.51535	0.99185	0.160635	58		302	204.741	32.0771	3.03203	0.00121456	42		33
4612	Antigen processing and presentation	Organismal Systems	79		1	0.149	0.380715	2.23527	0.0126999	39		6	0.265	0.927165	6.18552	3.09483e-10	7		4	1.234	1.06507	2.59701	0.00470199	31		151	133.86	34.6115	0.495211	0.310226	73		34
4973	Carbohydrate digestion and absorption	Organismal Systems	43		1	0.081	0.28021	3.27969	0.000519614	21		3	0.118	0.591968	4.8685	5.62231e-07	20		1	0.719	0.845431	0.332375	0.369803	76		198	81.95	30.0658	3.85987	5.67229e-05	33		35
4664	Fc epsilon RI signaling pathway	Organismal Systems	79		1	0.135	0.356233	2.42819	0.00758727	35		3	0.249	0.912048	3.01629	0.00127944	32		2	1.249	1.08728	0.690713	0.244873	65		261	133.966	33.8314	3.75491	8.67015e-05	34		36
5211	Renal cell carcinoma	Human Diseases	70		1	0.136	0.360047	2.39969	0.00820451	36		3	0.238	0.848573	3.25488	0.000567209	30		1	1.113	0.988538	-0.11431	0.545504	88		302	121.709	34.4241	5.23734	8.14527e-08	20		37
4144	Endocytosis	Cellular Processes	205		1	0.355	0.582507	1.10728	0.134086	49		3	0.585	1.31091	1.84223	0.032721	49		7	3.184	1.75933	2.16901	0.015041	35		267	234.674	29.7161	1.08783	0.138335	66		38.5
5218	Melanoma	Human Diseases	71		1	0.134	0.355204	2.43803	0.00738372	34		3	0.24	0.930196	2.96712	0.00150304	35		1	1.132	1.09626	-0.12041	0.547921	91		289	124.415	33.1904	4.95881	3.54632e-07	23		38.5
4666	Fc gamma R-mediated phagocytosis	Organismal Systems	96		1	0.172	0.413021	2.00474	0.0224955	43		3	0.317	1.04862	2.55859	0.00525483	38		2	1.533	1.18504	0.39408	0.346761	72		260	151.833	33.397	3.23882	0.000600121	38		40
4360	Axon guidance	Organismal Systems	129		1	0.245	0.489095	1.54367	0.0613346	47		3	0.388	1.08933	2.3978	0.0082469	42		5	2.012	1.41062	2.11822	0.0170783	37		194	184.1	34.3846	0.28792	0.386704	76		41
4670	Leukocyte transendothelial migration	Organismal Systems	118		1	0.229	0.482485	1.59798	0.055024	45		3	0.417	1.12266	2.30078	0.010702	44		4	1.883	1.39472	1.51786	0.0645245	47		209	173.441	33.6853	1.05562	0.14557	67		42
5146	Amoebiasis	Human Diseases	105		1	0.166	0.39319	2.12111	0.0169563	41		2	0.306	1.01262	1.6729	0.0471739	50		2	1.613	1.26603	0.30568	0.379924	77		276	160.67	32.5728	3.54069	0.000199541	36		43
4530	Tight junction	Cellular Processes	134		1	0.229	0.471998	1.63348	0.0511838	44		3	0.407	1.12988	2.29494	0.0108684	45		3	2.127	1.41947	0.61502	0.269271	67		272	188.186	32.9904	2.54056	0.00553375	53		44
61	Fatty acid biosynthesis	Metabolism	6		0	0.015	0.129583	-0.115756	0.546077	64		0	0.035	0.387201	-0.0903922	0.536012	63		1	0.1	0.319534	2.8166	0.00242675	26		6	7.684	16.5126	-0.101983	0.540615	84		45
4910	Insulin signaling pathway	Organismal Systems	137		1	0.243	0.496183	1.52565	0.0635488	48		3	0.438	1.21311	2.11193	0.0173461	47		2	2.137	1.46915	-0.0932515	0.537148	87		283	190.059	33.3938	2.78318	0.00269146	46		46
3430	Mismatch repair	Genetic Information Processing	23		0	0.051	0.229023	-0.222685	0.58811	101		0	0.113	0.648577	-0.174228	0.569157	109		3	0.368	0.607408	4.33316	7.34908e-06	6		48	49.119	28.3316	-0.0394965	0.515753	82		47
533	Glycosaminoglycan biosynthesis - keratan sulfate	Metabolism	15		1	0.023	0.149978	6.51428	3.65207e-11	2		1	0.036	0.367204	2.62524	0.00432936	37		1	0.217	0.475539	1.64655	0.0498249	45		0	29.648	24.3239	-1.21888	0.888556	129		48
4672	Intestinal immune network for IgA production	Organismal Systems	50		1	0.092	0.299375	3.03298	0.00121075	23		3	0.146	0.683485	4.17566	1.48561e-05	22		1	0.818	0.917452	0.198376	0.421376	81		69	93.912	31.4629	-0.79179	0.785758	113		49
4640	Hematopoietic cell lineage	Organismal Systems	89		1	0.147	0.373538	2.28357	0.0111984	37		6	0.232	0.826353	6.98007	1.47517e-12	4		2	1.339	1.14253	0.578538	0.28145	69		102	142.012	33.0691	-1.20995	0.886851	128		50
5020	Prion diseases	Human Diseases	36		0	0.07	0.259166	-0.270097	0.606457	131		0	0.121	0.669931	-0.180616	0.571665	120		2	0.589	0.754087	1.87114	0.0306631	41		151	70.831	29.841	2.68654	0.00360982	51		51
5219	Bladder cancer	Human Diseases	42		0	0.074	0.273127	-0.270936	0.60678	132		0	0.111	0.61892	-0.179345	0.571166	118		1	0.644	0.7758	0.458881	0.32316	70		218	81.586	31.1103	4.38485	5.80327e-06	28		52
5130	Pathogenic Escherichia coli infection	Human Diseases	59		0	0.103	0.332418	-0.309851	0.621663	155		0	0.161	0.696825	-0.231048	0.591361	159		4	0.941	1.00425	3.04604	0.00115939	21		198	106.622	33.5336	2.72497	0.00321535	49		53
780	Biotin metabolism	Metabolism	2		0	0.003	0.0547174	-0.0548272	0.521862	53.5		0	0.005	0.104814	-0.0477035	0.519024	54.5		0	0.025	0.156203	-0.160048	0.563578	93		0	1.045	7.72546	-0.135267	0.5538	86		54
4510	Focal adhesion	Cellular Processes	202		1	0.348	0.589273	1.10645	0.134267	50		3	0.534	1.32083	1.86701	0.0309501	48		2	3.166	1.77584	-0.656592	0.744278	145		319	235.726	29.3324	2.83898	0.0022629	45		55
514	O-Mannosyl glycan biosynthesis	Metabolism	3		0	0.004	0.0631505	-0.0633407	0.525252	56.5		0	0.002	0.044699	-0.0447438	0.517844	52.5		0	0.04	0.196057	-0.204022	0.580832	96		0	1.93	9.12954	-0.211402	0.583713	89		56
400	Phenylalanine, tyrosine and tryptophan biosynthesis	Metabolism	5		0	0.011	0.104355	-0.10541	0.541975	62		0	0.017	0.201871	-0.0842123	0.533556	62		0	0.064	0.244875	-0.261357	0.603092	103		8	4.932	13.0359	0.23535	0.406969	77		57
730	Thiamine metabolism	Metabolism	3		0	0.003	0.0547174	-0.0548272	0.521862	53.5		0	0.003	0.0547174	-0.0548272	0.521862	56		0	0.041	0.198389	-0.206664	0.581864	97		0	2.48	10.9113	-0.227287	0.5899	90		58
785	Lipoic acid metabolism	Metabolism	3		0	0.005	0.070569	-0.0708527	0.528242	58		0	0.011	0.170023	-0.064697	0.525792	59		0	0.048	0.213873	-0.224432	0.588789	99		0	1.772	10.2205	-0.173377	0.568823	87		59
3410	Base excision repair	Genetic Information Processing	34		0	0.063	0.243085	-0.259169	0.602248	124		0	0.086	0.461321	-0.186421	0.573943	125		2	0.56	0.72036	1.999	0.0228042	39		68	68.361	30.0211	-0.0120249	0.504797	81		60
524	Butirosin and neomycin biosynthesis	Metabolism	4		0	0.007	0.0834144	-0.0839184	0.533439	59		0	0.009	0.130138	-0.0691573	0.527568	60		0	0.066	0.267798	-0.246455	0.597335	100		1	2.79	10.2093	-0.17533	0.56959	88		61
511	Other glycan degradation	Metabolism	16		0	0.028	0.171012	-0.163731	0.565028	76		0	0.038	0.307653	-0.123516	0.549151	77		1	0.266	0.511376	1.43534	0.0755947	49		3	31.956	25.4324	-1.13855	0.872554	124		62
471	D-Glutamine and D-glutamate metabolism	Metabolism	4		0	0.004	0.0631505	-0.0633407	0.525252	56.5		0	0.006	0.0998698	-0.0600782	0.523953	58		0	0.063	0.251185	-0.250811	0.59902	102		1	3.87	12.5025	-0.229553	0.590781	91		63
603	Glycosphingolipid biosynthesis - globo series	Metabolism	14		0	0.028	0.165055	-0.16964	0.567353	77.5		0	0.051	0.388007	-0.131441	0.552287	84		1	0.209	0.455551	1.73636	0.0412501	43		0	28.678	23.9749	-1.19617	0.884184	127		64
300	Lysine biosynthesis	Metabolism	3		0	0.008	0.0891288	-0.0897577	0.53576	60.5		0	0.007	0.0946571	-0.0739512	0.529475	61		0	0.047	0.211745	-0.221965	0.58783	98		0	1.932	8.13988	-0.23735	0.593807	92		65
750	Vitamin B6 metabolism	Metabolism	6		0	0.003	0.0547174	-0.0548272	0.521862	53.5		0	0.005	0.104814	-0.0477035	0.519024	54.5		0	0.079	0.273558	-0.288787	0.613628	104		0	7.249	15.0795	-0.48072	0.684642	96		66
4514	Cell adhesion molecules (CAMs)	Environmental Information Processing	136		1	0.249	0.470341	1.59672	0.0551646	46		6	0.408	1.11659	5.00809	2.7487e-07	18		6	2.176	1.46327	2.61332	0.00448335	30		104	188.451	33.2554	-2.53947	0.994449	194		67
3440	Homologous recombination	Genetic Information Processing	28		0	0.054	0.230515	-0.234258	0.592608	111		0	0.092	0.501785	-0.183346	0.572737	123		2	0.471	0.68821	2.22171	0.0131516	34		40	58.378	29.0208	-0.633269	0.736721	105		68
232	Caffeine metabolism	Metabolism	7		0	0.008	0.0891288	-0.0897577	0.53576	60.5		0	0.012	0.20469	-0.0586253	0.523375	57		0	0.105	0.337771	-0.310862	0.622047	105		0	9.44	16.8016	-0.56185	0.712891	101		69
62	Fatty acid elongation in mitochondria	Metabolism	8		0	0.012	0.10894	-0.110153	0.543856	63		0	0.019	0.201692	-0.094203	0.537526	65		0	0.135	0.375388	-0.359628	0.640437	110		5	12.596	19.4465	-0.390611	0.651958	93		70
3420	Nucleotide excision repair	Genetic Information Processing	44		0	0.084	0.277527	-0.302674	0.618931	149		0	0.141	0.652338	-0.216146	0.585563	150		3	0.656	0.788851	2.97141	0.00148218	24		70	83.978	30.7269	-0.454912	0.675414	94		71
3030	DNA replication	Genetic Information Processing	36		0	0.066	0.260215	-0.253637	0.600112	121		0	0.095	0.506193	-0.187675	0.574434	127		2	0.514	0.688679	2.15776	0.0154734	36		52	71.885	29.3958	-0.676456	0.750624	109		72.5
5416	Viral myocarditis	Human Diseases	75		0	0.144	0.381326	-0.37763	0.647147	182		0	0.226	0.792182	-0.285288	0.612288	189		5	1.164	1.09741	3.4955	0.000236584	14		162	126.946	33.51	1.04608	0.147763	68		72.5
4320	Dorso-ventral axis formation	Organismal Systems	26		0	0.035	0.183872	-0.19035	0.575483	90		0	0.048	0.337357	-0.142282	0.556572	92		0	0.389	0.613233	-0.634343	0.737071	141		138	52.292	26.1443	3.27826	0.000522241	37		74
460	Cyanoamino acid metabolism	Metabolism	7		0	0.016	0.125538	-0.127452	0.550708	66		0	0.017	0.169528	-0.100278	0.539938	69		0	0.119	0.336083	-0.354079	0.63836	109		2	10.678	18.9461	-0.458036	0.676537	95		75
130	Ubiquinone and other terpenoid-quinone biosynthesis	Metabolism	7		0	0.016	0.133273	-0.120054	0.54778	65		0	0.033	0.352186	-0.0937005	0.537326	64		0	0.114	0.330323	-0.345117	0.634997	106		0	10.565	18.9895	-0.556361	0.711018	100		76
3450	Non-homologous end-joining	Genetic Information Processing	14		0	0.03	0.170673	-0.175775	0.569765	79		0	0.052	0.36528	-0.142357	0.556601	93		0	0.255	0.514042	-0.496068	0.690077	123		55	27.086	25.0618	1.11381	0.132681	65		77
5216	Thyroid cancer	Human Diseases	29		0	0.051	0.22461	-0.227061	0.589812	103.5		0	0.078	0.479735	-0.16259	0.564579	105		0	0.444	0.653675	-0.679236	0.751506	151		206	58.643	29.3416	5.02212	2.55527e-07	21		78
5330	Allograft rejection	Human Diseases	40		0	0.075	0.263523	-0.284605	0.612027	140		0	0.126	0.583493	-0.215941	0.585483	149		3	0.614	0.769153	3.10212	0.000960715	19		51	79.5	32.9474	-0.865016	0.806485	115		79
290	Valine, leucine and isoleucine biosynthesis	Metabolism	11		0	0.021	0.143456	-0.146387	0.558192	71		0	0.037	0.379176	-0.0975799	0.538867	67		0	0.18	0.416862	-0.431798	0.667056	116		8	20.815	24.1615	-0.530389	0.702079	98		80
5144	Malaria	Human Diseases	51		0	0.079	0.284323	-0.277853	0.609437	137		0	0.142	0.704509	-0.201559	0.579869	135		2	0.815	0.903101	1.31215	0.0947354	51		77	93.111	32.375	-0.497637	0.69063	97		81
430	Taurine and hypotaurine metabolism	Metabolism	10		0	0.02	0.14007	-0.142786	0.55677	70		0	0.044	0.426903	-0.103068	0.541045	71		0	0.157	0.398133	-0.394341	0.653335	113		5	18.311	21.7157	-0.612968	0.730051	102		82.5
5100	Bacterial invasion of epithelial cells	Human Diseases	73		0	0.136	0.362816	-0.374845	0.646112	180		0	0.201	0.813179	-0.247178	0.597615	169		2	1.122	1.02478	0.856772	0.195785	60		214	124.01	33.5946	2.6787	0.00369543	52		82.5
72	Synthesis and degradation of ketone bodies	Metabolism	9		0	0.021	0.150272	-0.139747	0.55557	69		0	0.044	0.443013	-0.0993199	0.539558	68		0	0.136	0.362816	-0.374845	0.646112	111		0	15.121	20.7371	-0.729177	0.767053	110		84
4962	Vasopressin-regulated water reabsorption	Organismal Systems	44		0	0.075	0.271014	-0.276739	0.60901	136		0	0.112	0.560152	-0.199946	0.579239	134		1	0.653	0.805754	0.430652	0.333361	71		83	85.834	33.222	-0.0853048	0.53399	83		85
740	Riboflavin metabolism	Metabolism	11		0	0.019	0.136593	-0.139099	0.555314	68		0	0.029	0.283265	-0.102378	0.540771	70		0	0.176	0.411331	-0.427879	0.66563	115		5	20.189	23.5727	-0.644347	0.740325	106		86
760	Nicotinate and nicotinamide metabolism	Metabolism	24		0	0.035	0.183872	-0.19035	0.575483	90		0	0.058	0.445909	-0.130071	0.551745	82		1	0.368	0.605758	1.04332	0.1484	55		6	48.384	25.7918	-1.64331	0.949841	152		87
790	Folate biosynthesis	Metabolism	11		0	0.018	0.133018	-0.13532	0.553821	67		0	0.027	0.27991	-0.0964597	0.538422	66		0	0.164	0.391481	-0.418922	0.662363	114		0	19.716	22.0123	-0.895682	0.814789	118		88
4940	Type I diabetes mellitus	Human Diseases	46		0	0.098	0.317012	-0.309137	0.621391	154		0	0.154	0.678782	-0.226877	0.58974	154		3	0.685	0.827321	2.79819	0.0025695	27		54	89.265	32.6085	-1.08147	0.860255	121		89
4710	Circadian rhythm - mammal	Organismal Systems	23		0	0.038	0.201486	-0.188599	0.574796	88		0	0.072	0.505046	-0.142561	0.556682	94		0	0.348	0.584155	-0.595732	0.724323	135		53	48.502	28.3077	0.158897	0.436875	78		90
5332	Graft-versus-host disease	Human Diseases	44		0	0.087	0.2992	-0.290776	0.614389	143.5		0	0.144	0.672098	-0.214254	0.584826	145		3	0.707	0.836571	2.74095	0.00306308	28		42	84.771	33.0775	-1.29305	0.902004	135		91
4122	Sulfur relay system	Genetic Information Processing	11		0	0.022	0.146757	-0.149908	0.559581	72		0	0.034	0.298216	-0.114011	0.545386	73		0	0.209	0.439901	-0.475107	0.682645	119		0	19.996	22.6824	-0.881564	0.810994	117		92
4520	Adherens junction	Cellular Processes	75		0	0.141	0.365037	-0.386262	0.650349	188.5		0	0.254	0.927547	-0.27384	0.607896	181		1	1.206	1.06522	-0.193387	0.576672	95		264	127.397	32.0558	4.26142	1.01568e-05	30		93
4110	Cell cycle	Cellular Processes	128		0	0.238	0.466448	-0.510239	0.695058	206		0	0.422	1.1319	-0.372825	0.64536	204		3	1.964	1.33435	0.776409	0.218754	62		278	183.317	34.5033	2.74418	0.00303316	48		94
5110	Vibrio cholerae infection	Human Diseases	56		0	0.094	0.305381	-0.307813	0.620888	153		0	0.151	0.678719	-0.222478	0.588029	153		1	0.897	0.925877	0.111246	0.455711	84		104	102.756	33.5893	0.0370356	0.485228	80		95
4650	Natural killer cell mediated cytotoxicity	Organismal Systems	137		0	0.269	0.533783	-0.50395	0.692852	205		0	0.452	1.20547	-0.374959	0.646154	206		5	2.16	1.4403	1.97181	0.0243159	40		213	191.227	33.8098	0.643984	0.259793	72		96
900	Terpenoid backbone biosynthesis	Metabolism	15		0	0.026	0.165382	-0.157211	0.562461	73		0	0.052	0.435299	-0.119458	0.547544	75		0	0.215	0.46367	-0.463692	0.678566	117		0	30.531	25.6331	-1.19108	0.883188	126		97
920	Sulfur metabolism	Metabolism	13		0	0.028	0.165055	-0.16964	0.567353	77.5		0	0.041	0.32776	-0.125092	0.549774	78		0	0.225	0.461072	-0.487993	0.687223	121		3	26.11	23.7251	-0.974075	0.83499	119		98
4114	Oocyte meiosis	Cellular Processes	115		0	0.199	0.430795	-0.461936	0.677937	200		0	0.34	1.05428	-0.322494	0.626461	198		3	1.846	1.33194	0.866407	0.193134	59		220	172.306	34.3381	1.38895	0.0824236	63		99.5
4950	Maturity onset diabetes of the young	Human Diseases	25		0	0.057	0.236235	-0.241286	0.595333	114		0	0.093	0.593889	-0.156595	0.562218	99		0	0.411	0.651539	-0.630814	0.735919	140		61	52.317	27.4169	0.316702	0.375735	74		99.5
604	Glycosphingolipid biosynthesis - ganglio series	Metabolism	15		0	0.025	0.156203	-0.160048	0.563578	74		0	0.044	0.40028	-0.109923	0.543765	72		0	0.228	0.475649	-0.479345	0.684153	120		0	29.861	24.1949	-1.23419	0.891434	131		101
5320	Autoimmune thyroid disease	Human Diseases	55		0	0.092	0.299375	-0.307306	0.620695	152		0	0.151	0.73671	-0.204965	0.5812	141		3	0.892	0.906177	2.32626	0.0100025	32		50	101.545	33.8333	-1.5235	0.936183	146		102
30	Pentose phosphate pathway	Metabolism	27		0	0.06	0.249925	-0.240072	0.594863	112		0	0.083	0.460786	-0.180127	0.571474	119		1	0.45	0.681149	0.807459	0.209701	61		11	56.264	27.6987	-1.63416	0.948887	151		103
360	Phenylalanine metabolism	Metabolism	17		0	0.038	0.196455	-0.193428	0.576688	92		0	0.063	0.487102	-0.129336	0.551454	81		0	0.281	0.527558	-0.532643	0.70286	128		13	35.067	25.4391	-0.867446	0.807151	116		104
770	Pantothenate and CoA biosynthesis	Metabolism	16		0	0.026	0.159215	-0.163301	0.564859	75		0	0.046	0.384749	-0.119558	0.547584	76		0	0.248	0.48242	-0.514075	0.6964	125		0	33.917	27.3073	-1.24205	0.892891	132		105
4614	Renin-angiotensin system	Organismal Systems	17		0	0.034	0.18132	-0.187514	0.574371	86		0	0.05	0.342954	-0.145792	0.557957	95		0	0.275	0.499624	-0.550413	0.708982	129		13	35.023	26.9753	-0.816414	0.792868	114		106.5
4912	GnRH signaling pathway	Organismal Systems	101		0	0.186	0.411793	-0.451683	0.674251	199		0	0.347	1.04292	-0.33272	0.630327	199		2	1.627	1.22857	0.303605	0.380714	78		235	158.854	34.6317	2.19874	0.0139482	56		106.5
630	Glyoxylate and dicarboxylate metabolism	Metabolism	16		0	0.035	0.183872	-0.19035	0.575483	90		0	0.064	0.467035	-0.137035	0.554498	90		0	0.255	0.49822	-0.511822	0.695612	124		5	32.154	24.8954	-1.09072	0.862303	122		108
4060	Cytokine-cytokine receptor interaction	Environmental Information Processing	266		1	0.537	0.731551	0.632902	0.263399	51		3	0.883	1.68409	1.25706	0.104366	51		5	4.225	2.00908	0.385748	0.349842	73		163	268.914	29.5904	-3.57933	0.999828	214		109
670	One carbon pool by folate	Metabolism	18		0	0.036	0.191679	-0.187814	0.574489	87		0	0.052	0.391726	-0.132746	0.552803	86		0	0.304	0.549441	-0.553289	0.709967	130		8	37.491	26.9187	-1.09556	0.863364	123		110
3020	RNA polymerase	Genetic Information Processing	29		0	0.055	0.228094	-0.241128	0.595272	113		0	0.086	0.54672	-0.157302	0.562496	101		0	0.483	0.684236	-0.705897	0.759874	155		61	58.815	27.9478	0.0781814	0.468842	79		111
120	Primary bile acid biosynthesis	Metabolism	16		0	0.032	0.176088	-0.181727	0.572102	82		0	0.049	0.383074	-0.127913	0.550891	80		0	0.255	0.490118	-0.520283	0.698567	127		0	34.121	25.6475	-1.33038	0.908304	136		112
100	Steroid biosynthesis	Metabolism	18		0	0.031	0.173404	-0.178773	0.570942	80		0	0.051	0.431956	-0.118068	0.546993	74		0	0.261	0.503122	-0.51876	0.698036	126		2	36.429	24.7673	-1.3901	0.91775	142		113
4350	TGF-beta signaling pathway	Environmental Information Processing	85		0	0.164	0.401578	-0.408388	0.658506	193		0	0.286	0.961836	-0.297348	0.6169	195		1	1.281	1.12129	-0.250604	0.59894	101		222	137.579	34.1148	2.47461	0.00666903	54		114
562	Inositol phosphate metabolism	Metabolism	57		0	0.11	0.331678	-0.331647	0.629922	166.5		0	0.164	0.69971	-0.234383	0.592656	161		2	0.884	0.915085	1.21956	0.111316	53		63	104.101	32.526	-1.26364	0.896819	133		115
592	alpha-Linolenic acid metabolism	Metabolism	19		0	0.033	0.184242	-0.179113	0.571075	81		0	0.056	0.441655	-0.126796	0.550449	79		0	0.301	0.537297	-0.560212	0.712333	132		4	39.603	26.1945	-1.35918	0.912955	140		116
4340	Hedgehog signaling pathway	Environmental Information Processing	56		0	0.091	0.287753	-0.316243	0.624091	158		0	0.133	0.570646	-0.233069	0.592146	160		1	0.877	0.910329	0.135116	0.44626	83		81	102.114	31.2954	-0.674668	0.750057	108		117
4960	Aldosterone-regulated sodium reabsorption	Organismal Systems	42		0	0.075	0.274682	-0.273043	0.60759	134		0	0.142	0.711577	-0.199557	0.579086	132		0	0.667	0.792931	-0.841183	0.799877	175		173	82.19	31.5321	2.87992	0.00198889	43		118
4070	Phosphatidylinositol signaling system	Environmental Information Processing	78		0	0.144	0.378692	-0.380257	0.648123	185		0	0.224	0.810235	-0.276463	0.608904	184		2	1.272	1.12307	0.648225	0.25842	66		112	132.307	32.2609	-0.629461	0.735476	104		119
4971	Gastric acid secretion	Organismal Systems	74		0	0.126	0.355317	-0.354613	0.63856	172		0	0.227	0.888966	-0.255353	0.600775	173		1	1.125	1.07263	-0.116536	0.546386	89		109	127.385	34.4253	-0.534055	0.703348	99		120
3040	Spliceosome	Genetic Information Processing	129		0	0.256	0.510612	-0.501359	0.691941	204		0	0.465	1.22731	-0.378878	0.647611	208		18	2.129	1.45068	10.9404	3.69326e-28	1		129	184.532	33.3005	-1.6676	0.952303	154		121
472	D-Arginine and D-ornithine metabolism	Metabolism	1		0	0.003	0.0547174	-0.0548272	0.521862	53.5		0	0.002	0.044699	-0.0447438	0.517844	52.5		0	0.014	0.117549	-0.119099	0.547402	90		0	0	0	NaN	0	220		122
531	Glycosaminoglycan degradation	Metabolism	19		0	0.036	0.196832	-0.182897	0.572561	83		0	0.076	0.540848	-0.14052	0.555875	91		0	0.311	0.559099	-0.556252	0.710981	131		2	40.473	25.8985	-1.48553	0.931298	144		123
4130	SNARE interactions in vesicular transport	Genetic Information Processing	36		0	0.063	0.255139	-0.246924	0.597516	118.5		0	0.11	0.61829	-0.17791	0.570603	115		1	0.575	0.721731	0.588862	0.277977	68		9	70.467	29.8298	-2.06059	0.980329	178		124
4120	Ubiquitin mediated proteolysis	Genetic Information Processing	139		0	0.244	0.492653	-0.495278	0.689798	202		0	0.437	1.18382	-0.369144	0.64399	203		2	2.213	1.4155	-0.150477	0.559806	92		221	192.783	32.979	0.855606	0.196108	69		125
3022	Basal transcription factors	Genetic Information Processing	36		0	0.068	0.263525	-0.25804	0.601812	123		0	0.132	0.707868	-0.186475	0.573964	126		0	0.565	0.741839	-0.761621	0.776857	165		80	71.244	30.3549	0.288454	0.3865	75		126
410	beta-Alanine metabolism	Metabolism	22		0	0.033	0.178726	-0.18464	0.573244	84.5		0	0.07	0.528564	-0.132434	0.55268	85		0	0.355	0.565061	-0.62825	0.73508	139		8	46.486	26.298	-1.46345	0.928328	143		127
4540	Gap junction	Cellular Processes	90		0	0.175	0.417791	-0.418869	0.662344	196		0	0.278	0.951642	-0.292127	0.614905	194		1	1.436	1.15985	-0.375911	0.646508	112		210	145.77	33.5923	1.91204	0.0279353	60		128
4270	Vascular smooth muscle contraction	Organismal Systems	116		0	0.21	0.449558	-0.467126	0.679795	201		0	0.319	0.954017	-0.334375	0.630952	200		2	1.789	1.31613	0.160318	0.436315	82		168	171.514	33.9306	-0.103564	0.541242	85		129
532	Glycosaminoglycan biosynthesis - chondroitin sulfate	Metabolism	22		0	0.033	0.178726	-0.18464	0.573244	84.5		0	0.05	0.381635	-0.131015	0.552118	83		0	0.332	0.581476	-0.570961	0.715987	133		0	44.248	26.3115	-1.6817	0.953687	155		130
4964	Proximal tubule bicarbonate reclamation	Organismal Systems	23		0	0.038	0.191292	-0.198649	0.578731	93		0	0.058	0.427573	-0.135649	0.553951	89		0	0.367	0.603884	-0.607733	0.728318	137		8	46.939	26.1412	-1.48957	0.931831	145		131
4330	Notch signaling pathway	Environmental Information Processing	47		0	0.094	0.298753	-0.314641	0.623483	157		0	0.13	0.58604	-0.221828	0.587776	152		0	0.727	0.872486	-0.833251	0.797648	172		173	89.664	30.5919	2.72412	0.00322366	50		132
3060	Protein export	Genetic Information Processing	24		0	0.047	0.216421	-0.21717	0.585962	100		0	0.068	0.386685	-0.175854	0.569796	111		0	0.371	0.611337	-0.606867	0.72803	136		12	49.678	28.2895	-1.33187	0.908549	137		133
4916	Melanogenesis	Organismal Systems	102		0	0.195	0.446289	-0.436936	0.668921	197		0	0.369	1.10002	-0.335448	0.631356	201		1	1.624	1.27681	-0.488716	0.687479	122		226	157.967	35.1915	1.93323	0.0266042	59		134
4744	Phototransduction	Organismal Systems	29		0	0.053	0.228568	-0.231879	0.591684	108		0	0.07	0.444182	-0.157593	0.562611	102		0	0.455	0.642174	-0.708531	0.760692	158		31	58.579	27.9505	-0.98671	0.838107	120		135
1040	Biosynthesis of unsaturated fatty acids	Metabolism	21		0	0.043	0.202959	-0.211866	0.583894	96		0	0.07	0.466173	-0.150159	0.55968	96		0	0.339	0.581737	-0.582738	0.719965	134		0	43.961	26.7271	-1.64481	0.949995	153		136
910	Nitrogen metabolism	Metabolism	23		0	0.045	0.207408	-0.216964	0.585882	99		0	0.082	0.52873	-0.155089	0.561624	98		0	0.368	0.60078	-0.612537	0.729909	138		5	47.436	27.7084	-1.53152	0.93718	147		137
52	Galactose metabolism	Metabolism	26		0	0.04	0.196057	-0.204022	0.580832	95		0	0.056	0.413564	-0.135408	0.553855	88		0	0.41	0.637422	-0.643216	0.739958	142		11	53.952	27.6028	-1.55607	0.940155	149		138
4930	Type II diabetes mellitus	Human Diseases	47		0	0.099	0.308698	-0.320702	0.625782	162		0	0.144	0.596339	-0.241474	0.595406	165		0	0.753	0.858328	-0.877287	0.809834	180		181	89.917	33.1235	2.7498	0.00298157	47		139
5310	Asthma	Human Diseases	32		0	0.068	0.251872	-0.269979	0.606412	130		0	0.112	0.594819	-0.188293	0.574676	128		0	0.486	0.721335	-0.673751	0.749765	149		43	64.875	29.7878	-0.734362	0.768636	111		140
3018	RNA degradation	Genetic Information Processing	59		0	0.109	0.3365	-0.323923	0.627002	164		0	0.16	0.671454	-0.238289	0.594171	164		2	0.926	0.940962	1.14139	0.126855	54		40	107.078	34.8178	-1.92654	0.972982	173		141
450	Selenoamino acid metabolism	Metabolism	26		0	0.04	0.201098	-0.198908	0.578833	94		0	0.099	0.630553	-0.157005	0.56238	100		0	0.404	0.60593	-0.666744	0.747532	148		10	53.277	28.2217	-1.53347	0.93742	148		142
5014	Amyotrophic lateral sclerosis (ALS)	Human Diseases	54		0	0.105	0.325701	-0.322382	0.626418	163		0	0.188	0.790747	-0.23775	0.593962	163		0	0.844	0.912412	-0.92502	0.822522	187		177	99.714	31.8478	2.42673	0.00761776	55		143
520	Amino sugar and nucleotide sugar metabolism	Metabolism	45		0	0.075	0.267295	-0.280589	0.610487	139		0	0.121	0.592207	-0.20432	0.580948	139.5		1	0.705	0.81893	0.360226	0.359339	74		7	84.378	30.2744	-2.55589	0.994704	195		144
250	Alanine, aspartate and glutamate metabolism	Metabolism	32		0	0.056	0.24274	-0.230699	0.591226	105		0	0.09	0.521701	-0.172513	0.568483	107		0	0.505	0.717279	-0.704049	0.759299	153		17	65.27	28.3421	-1.70312	0.955727	158		145.5
4966	Collecting duct acid secretion	Organismal Systems	27		0	0.051	0.220108	-0.231705	0.591616	106.5		0	0.109	0.630489	-0.172882	0.568628	108		0	0.406	0.617694	-0.657284	0.744501	147		4	55.515	29.5938	-1.74074	0.959135	161		145.5
20	Citrate cycle (TCA cycle)	Metabolism	31		0	0.051	0.220108	-0.231705	0.591616	106.5		0	0.086	0.543046	-0.158366	0.562916	103		0	0.508	0.693121	-0.732917	0.768195	162		14	63.496	29.103	-1.70072	0.955502	157		147
534	Glycosaminoglycan biosynthesis - heparan sulfate	Metabolism	26		0	0.055	0.236709	-0.232353	0.591868	109		0	0.119	0.655186	-0.181628	0.572063	121		0	0.414	0.631667	-0.655409	0.743898	143		3	55.21	28.3658	-1.84059	0.96716	166		148
310	Lysine degradation	Metabolism	44		0	0.073	0.27156	-0.268817	0.605965	129		0	0.108	0.602245	-0.179329	0.57116	117		0	0.697	0.820893	-0.849076	0.80208	178		49	84.763	30.6439	-1.16705	0.878405	125		149.5
5150	Staphylococcus aureus infection	Human Diseases	57		0	0.118	0.343794	-0.343229	0.634287	170		0	0.223	0.894467	-0.249311	0.59844	170		1	0.944	0.955917	0.0585825	0.476642	85		39	103.098	34.0245	-1.88388	0.970209	170		149.5
4720	Long-term potentiation	Organismal Systems	70		0	0.138	0.364814	-0.378275	0.647387	183		0	0.232	0.86656	-0.267725	0.605545	178		0	1.126	1.04939	-1.073	0.858365	201		217	120.762	33.6921	2.8564	0.00214239	44		151
270	Cysteine and methionine metabolism	Metabolism	36		0	0.07	0.263	-0.266159	0.604942	126		0	0.12	0.6768	-0.177305	0.570366	114		0	0.625	0.77909	-0.802217	0.788786	169		30	71.186	30.7432	-1.33968	0.909825	138		152
53	Ascorbate and aldarate metabolism	Metabolism	26		0	0.056	0.230037	-0.243439	0.596167	116		0	0.092	0.521352	-0.176464	0.570035	112		0	0.452	0.667939	-0.676709	0.750705	150		3	54.939	28.7958	-1.8037	0.964361	164		153
340	Histidine metabolism	Metabolism	29		0	0.045	0.212179	-0.212085	0.58398	97.5		0	0.064	0.479723	-0.13341	0.553066	87		0	0.485	0.687202	-0.70576	0.759831	154		5	58.374	25.8196	-2.06719	0.980642	179		154
565	Ether lipid metabolism	Metabolism	35		0	0.05	0.222597	-0.224621	0.588863	102		0	0.06	0.369509	-0.162378	0.564496	104		0	0.531	0.699663	-0.758937	0.776055	164		16	69.847	29.8276	-1.80528	0.964484	165		155.5
601	Glycosphingolipid biosynthesis - lacto and neolacto series	Metabolism	28		0	0.052	0.222138	-0.234089	0.592542	110		0	0.086	0.520456	-0.16524	0.565622	106		0	0.452	0.6886	-0.656404	0.744218	144		0	57.537	28.5515	-2.0152	0.978058	175		155.5
591	Linoleic acid metabolism	Metabolism	29		0	0.045	0.212179	-0.212085	0.58398	97.5		0	0.083	0.540743	-0.153492	0.560995	97		0	0.5	0.685909	-0.72896	0.766987	161		5	59.101	28.2416	-1.91565	0.972295	171		157
650	Butanoate metabolism	Metabolism	30		0	0.059	0.244087	-0.241717	0.5955	115		0	0.108	0.610499	-0.176905	0.570208	113		0	0.467	0.659808	-0.707782	0.76046	156		9	61.189	29.3494	-1.7782	0.962314	163		158
3320	PPAR signaling pathway	Organismal Systems	69		0	0.124	0.364358	-0.340325	0.633194	168		0	0.191	0.779183	-0.245129	0.596822	168		0	1.102	1.02599	-1.07409	0.858608	202		169	120.251	32.2607	1.5111	0.0653821	62		159
4115	p53 signaling pathway	Cellular Processes	69		0	0.132	0.35313	-0.3738	0.645723	179		0	0.252	0.948365	-0.265721	0.604773	177		0	1.088	1.03505	-1.05116	0.853407	198		190	120.075	33.9532	2.05945	0.0197254	58		160
4140	Regulation of autophagy	Cellular Processes	35		0	0.073	0.267848	-0.272542	0.607397	133		0	0.113	0.578416	-0.195361	0.577445	131		0	0.58	0.737661	-0.786269	0.784145	167		33	70.574	29.1269	-1.29001	0.901476	134		161.5
5217	Basal cell carcinoma	Human Diseases	55		0	0.129	0.349974	-0.368599	0.643787	175		0	0.233	0.838698	-0.277812	0.609421	186		0	0.864	0.916703	-0.942508	0.827034	189		146	104.282	36.0646	1.15676	0.123686	64		161.5
260	Glycine, serine and threonine metabolism	Metabolism	32		0	0.051	0.22461	-0.227061	0.589812	103.5		0	0.086	0.482532	-0.178227	0.570728	116		0	0.513	0.724124	-0.708442	0.760665	157		8	64.462	30.6059	-1.84481	0.967467	167		163.5
563	Glycosylphosphatidylinositol(GPI)-anchor biosynthesis	Metabolism	25		0	0.061	0.23945	-0.25475	0.600542	122		0	0.118	0.585165	-0.201652	0.579906	136		0	0.441	0.671543	-0.656697	0.744312	146		2	54.018	29.9278	-1.73811	0.958905	159		163.5
4970	Salivary secretion	Organismal Systems	89		0	0.154	0.382662	-0.402444	0.656321	192		0	0.279	0.978835	-0.285033	0.612191	188		1	1.393	1.13659	-0.34577	0.635242	107		98	144.08	34.3736	-1.34057	0.909969	139		165
240	Pyrimidine metabolism	Metabolism	99		0	0.173	0.42338	-0.408617	0.65859	194		0	0.245	0.841239	-0.291237	0.614565	193		2	1.561	1.23766	0.354701	0.361407	75		91	153.648	33.8597	-1.85022	0.967859	169		166
4730	Long-term depression	Organismal Systems	70		0	0.125	0.35426	-0.352848	0.637899	171		0	0.21	0.838214	-0.250533	0.598912	172		0	1.027	1.01454	-1.01228	0.844297	196		146	122.04	34.2252	0.70007	0.241942	71		167
512	O-Glycan biosynthesis	Metabolism	30		0	0.062	0.249436	-0.248561	0.59815	120		0	0.113	0.64393	-0.175485	0.569651	110		0	0.471	0.68821	-0.684384	0.753134	152		0	62.464	30.0788	-2.07668	0.981085	180		168
51	Fructose and mannose metabolism	Metabolism	34		0	0.067	0.254117	-0.263658	0.603978	125		0	0.089	0.472549	-0.18834	0.574695	129		0	0.509	0.714443	-0.712443	0.761905	159		16	67.88	29.8461	-1.73825	0.958916	160		169
5414	Dilated cardiomyopathy	Human Diseases	92		0	0.153	0.386963	-0.395386	0.653721	191		0	0.284	0.980972	-0.289509	0.613904	190		1	1.414	1.195	-0.346443	0.635495	108		92	146.247	34.5907	-1.56825	0.941589	150		170
3050	Proteasome	Genetic Information Processing	48		0	0.085	0.282586	-0.300793	0.618214	148		0	0.138	0.641379	-0.215161	0.585179	148		0	0.725	0.855633	-0.847326	0.801593	176		52	90.344	31.1688	-1.2302	0.890689	130		171
4310	Wnt signaling pathway	Environmental Information Processing	151		0	0.294	0.509729	-0.576777	0.717955	215		0	0.525	1.28726	-0.407844	0.658306	214		1	2.383	1.51083	-0.915394	0.820007	185		276	203.523	33.6152	2.15608	0.0155387	57		172
620	Pyruvate metabolism	Metabolism	40		0	0.063	0.255139	-0.246924	0.597516	118.5		0	0.12	0.658813	-0.182146	0.572266	122		0	0.602	0.784992	-0.766887	0.778426	166		17	78.793	30.5393	-2.0234	0.978484	176		173.5
4145	Phagosome	Cellular Processes	159		0	0.287	0.541224	-0.530279	0.702041	209		0	0.443	1.17819	-0.375999	0.646541	207		4	2.526	1.47088	1.00212	0.158143	57		124	207.861	32.2823	-2.59774	0.995308	197		173.5
4142	Lysosome	Cellular Processes	121		0	0.237	0.474401	-0.499578	0.691314	203		0	0.371	1.04712	-0.354306	0.638445	202		4	1.87	1.31027	1.62561	0.0520158	46		44	175.323	33.2543	-3.94905	0.999961	215		175
40	Pentose and glucuronate interconversions	Metabolism	32		0	0.062	0.253417	-0.244656	0.596639	117		0	0.101	0.550547	-0.183454	0.572779	124		0	0.503	0.698913	-0.719689	0.764142	160		0	65.638	29.219	-2.24641	0.987661	183		176
640	Propanoate metabolism	Metabolism	33		0	0.069	0.257498	-0.267963	0.605636	128		0	0.126	0.650036	-0.193835	0.576848	130		0	0.531	0.709607	-0.748301	0.772861	163		9	67.49	30.4943	-1.91806	0.972449	172		177
600	Sphingolipid metabolism	Metabolism	41		0	0.072	0.269979	-0.266687	0.605145	127		0	0.126	0.623308	-0.202147	0.580099	137		0	0.655	0.816481	-0.802223	0.788788	170		7	79.732	30.749	-2.36534	0.990993	186		178
5322	Systemic lupus erythematosus	Human Diseases	142		0	0.283	0.543329	-0.520863	0.698769	208		0	0.462	1.18742	-0.389079	0.651391	210		2	2.27	1.46944	-0.183743	0.572893	94		110	193.59	34.8978	-2.39528	0.991696	187		179
350	Tyrosine metabolism	Metabolism	41		0	0.078	0.272011	-0.286753	0.612849	142		0	0.121	0.592207	-0.20432	0.580948	139.5		0	0.662	0.779977	-0.848743	0.801988	177		18	81.094	31.9287	-1.97609	0.975928	174		181
4972	Pancreatic secretion	Organismal Systems	101		0	0.191	0.429772	-0.444422	0.671631	198		0	0.323	1.02358	-0.315559	0.623831	197		1	1.586	1.25307	-0.467653	0.679984	118		90	158.769	33.3906	-2.05953	0.980278	177		181
5412	Arrhythmogenic right ventricular cardiomyopathy (ARVC)	Human Diseases	76		0	0.131	0.357725	-0.366203	0.642893	174		0	0.202	0.762744	-0.264833	0.604431	176		0	1.197	1.09882	-1.08935	0.862001	205		103	130.091	34.402	-0.787482	0.7845	112		181
860	Porphyrin and chlorophyll metabolism	Metabolism	43		0	0.076	0.276225	-0.275138	0.608395	135		0	0.125	0.593066	-0.210769	0.583466	144		0	0.656	0.798938	-0.82109	0.794202	171		12	84.568	32.0077	-2.26721	0.988311	184		183
230	Purine metabolism	Metabolism	161		0	0.312	0.573572	-0.543959	0.706765	211		0	0.471	1.16384	-0.404696	0.65715	213		3	2.662	1.62678	0.207773	0.417703	80		106	209.127	32.7395	-3.14993	0.999183	207		184
380	Tryptophan metabolism	Metabolism	42		0	0.082	0.274502	-0.298723	0.617424	147		0	0.139	0.695818	-0.199765	0.579168	133		0	0.665	0.790823	-0.840897	0.799797	174		10	80.298	29.266	-2.40204	0.991848	188		185
5016	Huntington's disease	Human Diseases	189		0	0.323	0.554056	-0.582974	0.720044	216		0	0.544	1.29528	-0.419987	0.662753	215		0	2.987	1.66602	-1.7929	0.963506	218		253	226.171	31.9102	0.840767	0.200239	70		186
4742	Taste transduction	Organismal Systems	52		0	0.087	0.292432	-0.297505	0.616959	146		0	0.159	0.756499	-0.210179	0.583236	143		0	0.813	0.852501	-0.953665	0.829873	192		38	96.68	31.7473	-1.84834	0.967724	168		187
71	Fatty acid metabolism	Metabolism	42		0	0.087	0.295835	-0.294083	0.615653	145		0	0.137	0.639249	-0.214314	0.584849	146		0	0.663	0.789972	-0.839271	0.799341	173		4	81.89	31.8984	-2.44182	0.992693	190		188
280	Valine, leucine and isoleucine degradation	Metabolism	44		0	0.087	0.2992	-0.290776	0.614389	143.5		0	0.147	0.684002	-0.214912	0.585082	147		0	0.7	0.81527	-0.858612	0.804723	179		7	85.588	31.6765	-2.48096	0.993449	192		189
2010	ABC transporters	Environmental Information Processing	44		0	0.088	0.290414	-0.303016	0.619061	150		0	0.145	0.657577	-0.220507	0.587262	151		0	0.735	0.836346	-0.878823	0.810251	181		14	83.494	30.4379	-2.28314	0.988789	185		190
500	Starch and sucrose metabolism	Metabolism	53		0	0.08	0.2858	-0.279916	0.610229	138		0	0.131	0.642068	-0.204028	0.580834	138		0	0.799	0.903003	-0.884825	0.811875	182		11	96.969	30.5925	-2.81013	0.997524	201		191
561	Glycerolipid metabolism	Metabolism	49		0	0.079	0.277193	-0.285	0.612178	141		0	0.1	0.479823	-0.20841	0.582546	142		0	0.794	0.881102	-0.901144	0.816244	183		7	91.846	32.6223	-2.60086	0.99535	198		192
330	Arginine and proline metabolism	Metabolism	54		0	0.099	0.315116	-0.31417	0.623304	156		0	0.176	0.762631	-0.23078	0.591257	157		0	0.868	0.907414	-0.956565	0.830607	193		30	100.431	32.0092	-2.20034	0.986109	182		193.5
970	Aminoacyl-tRNA biosynthesis	Genetic Information Processing	51		0	0.102	0.322024	-0.316746	0.624282	159		0	0.159	0.688617	-0.230898	0.591303	158		0	0.818	0.863494	-0.947314	0.828261	191		23	96.924	34.5534	-2.13941	0.983799	181		193.5
4810	Regulation of actin cytoskeleton	Cellular Processes	216		0	0.375	0.612168	-0.612577	0.729922	217		0	0.656	1.43657	-0.456644	0.676036	217		1	3.397	1.76989	-1.35432	0.912183	213		226	244.052	29.4378	-0.613225	0.730136	103		195
510	N-Glycan biosynthesis	Metabolism	48		0	0.089	0.291829	-0.304973	0.619807	151		0	0.147	0.646381	-0.22742	0.589951	155		0	0.768	0.834789	-0.919993	0.821212	186		7	92.654	33.4173	-2.56317	0.994814	196		196
4141	Protein processing in endoplasmic reticulum	Genetic Information Processing	168		0	0.303	0.552717	-0.548201	0.708223	212		0	0.481	1.21041	-0.397384	0.654458	212		0	2.626	1.61019	-1.63086	0.94854	215		194	215.161	32.0456	-0.660341	0.745483	107		197
480	Glutathione metabolism	Metabolism	50		0	0.097	0.30608	-0.316911	0.624344	160		0	0.173	0.754745	-0.229216	0.59065	156		0	0.822	0.901737	-0.911574	0.819004	184		13	94.279	32.081	-2.53356	0.994354	193		198
983	Drug metabolism - other enzymes	Metabolism	52		0	0.106	0.332979	-0.318339	0.624886	161		0	0.183	0.74704	-0.244967	0.596759	167		0	0.819	0.880349	-0.930313	0.823895	188		10	98.127	36.0594	-2.44394	0.992736	191		199
10	Glycolysis / Gluconeogenesis	Metabolism	64		0	0.11	0.331678	-0.331647	0.629922	166.5		0	0.196	0.78243	-0.250502	0.5989	171		0	0.976	0.983052	-0.992827	0.839603	194		32	113.643	33.5084	-2.43649	0.992585	189		200
140	Steroid hormone biosynthesis	Metabolism	56		0	0.101	0.311281	-0.324466	0.627207	165		0	0.174	0.739101	-0.235421	0.593059	162		0	0.858	0.908108	-0.944821	0.827625	190		9	102.163	32.4429	-2.8716	0.997958	203		201
590	Arachidonic acid metabolism	Metabolism	58		0	0.115	0.337474	-0.340767	0.63336	169		0	0.187	0.77112	-0.242504	0.595805	166		0	0.939	0.938168	-1.00089	0.841559	195		11	105.453	33.0396	-2.85878	0.997874	202		202
5010	Alzheimer's disease	Human Diseases	173		0	0.288	0.52472	-0.548864	0.708451	213		0	0.496	1.29756	-0.382255	0.648864	209		0	2.64	1.56552	-1.68634	0.954135	216		174	217.122	31.2382	-1.38043	0.916272	141		203
5410	Hypertrophic cardiomyopathy (HCM)	Human Diseases	85		0	0.159	0.381923	-0.416315	0.66141	195		0	0.278	0.911892	-0.304861	0.619764	196		0	1.356	1.15525	-1.17377	0.879757	211		78	139.963	35.0225	-1.76924	0.961573	162		204
4020	Calcium signaling pathway	Environmental Information Processing	178		0	0.312	0.546768	-0.570626	0.715873	214		0	0.521	1.23088	-0.423273	0.663952	216		1	2.77	1.64676	-1.07484	0.858777	203		168	222.922	32.357	-1.69738	0.955187	156		205
4610	Complement and coagulation cascades	Organismal Systems	69		0	0.129	0.347102	-0.371649	0.644923	176		0	0.228	0.864154	-0.263842	0.604049	175		0	1.084	1.02176	-1.06092	0.855636	199		29	119.042	32.5267	-2.76825	0.997182	200		206
4260	Cardiac muscle contraction	Organismal Systems	80		0	0.128	0.354601	-0.360969	0.640939	173		0	0.176	0.671919	-0.261936	0.603315	174		0	1.194	1.0656	-1.1205	0.868749	206		24	134.048	32.47	-3.38922	0.99965	211		207
830	Retinol metabolism	Metabolism	65		0	0.131	0.352084	-0.372071	0.64508	178		0	0.191	0.689198	-0.277134	0.609161	185		0	1.037	1.0073	-1.02949	0.848375	197		1	114.194	32.3585	-3.49813	0.999766	212		208.5
4146	Peroxisome	Cellular Processes	78		0	0.141	0.365037	-0.386262	0.650349	188.5		0	0.227	0.828346	-0.27404	0.607973	182		0	1.19	1.11227	-1.06989	0.857665	200		26	130.798	34.1269	-3.07083	0.998933	206		208.5
190	Oxidative phosphorylation	Metabolism	137		0	0.277	0.518208	-0.534534	0.703514	210		0	0.427	1.09539	-0.389817	0.651664	211		1	2.122	1.41744	-0.79157	0.785694	168		22	190.866	34.1613	-4.9432	1	216		210
4974	Protein digestion and absorption	Organismal Systems	80		0	0.142	0.382076	-0.371654	0.644925	177		0	0.25	0.922144	-0.271107	0.606846	180		0	1.269	1.08896	-1.16534	0.878059	209		23	131.337	33.5024	-3.2337	0.999389	208		211
980	Metabolism of xenobiotics by cytochrome P450	Metabolism	71		0	0.135	0.359032	-0.376011	0.646546	181		0	0.202	0.749505	-0.269511	0.606232	179		0	1.189	1.04994	-1.13244	0.871276	207		7	123.254	34.3149	-3.38786	0.999648	210		212
4512	ECM-receptor interaction	Environmental Information Processing	84		0	0.149	0.383335	-0.388694	0.651249	190		0	0.237	0.861146	-0.275215	0.608424	183		0	1.32	1.10581	-1.19369	0.883701	212		48	136.823	33.087	-2.68453	0.996368	199		213
3010	Ribosome	Genetic Information Processing	88		0	0.157	0.408066	-0.384742	0.649786	187		0	0.284	0.976882	-0.290721	0.614368	191		0	1.334	1.16696	-1.14314	0.873509	208		46	143.496	33.3845	-2.9204	0.998252	204		214
982	Drug metabolism - cytochrome P450	Metabolism	73		0	0.134	0.352375	-0.380277	0.64813	186		0	0.237	0.841153	-0.281756	0.610935	187		0	1.192	1.10107	-1.08259	0.860504	204		8	125.775	33.2615	-3.54088	0.999801	213		215
564	Glycerophospholipid metabolism	Metabolism	79		0	0.142	0.374134	-0.379544	0.647858	184		0	0.208	0.715016	-0.290903	0.614437	192		0	1.305	1.1123	-1.17324	0.879651	210		16	131.095	34.1241	-3.37284	0.999628	209		216
5012	Parkinson's disease	Human Diseases	136		0	0.248	0.48242	-0.514075	0.6964	207		0	0.392	1.0514	-0.372836	0.645365	205		0	2.066	1.40272	-1.47286	0.929605	214		92	189.464	32.7591	-2.97517	0.998536	205		217
4080	Neuroactive ligand-receptor interaction	Environmental Information Processing	272		0	0.495	0.687348	-0.720159	0.764286	218		0	0.841	1.54081	-0.545817	0.707404	218		1	4.394	2.00918	-1.68925	0.954414	217		119	270.547	29.2062	-5.18886	1	217		218
4740	Olfactory transduction	Organismal Systems	388		0	0.69	0.785186	-0.878773	0.810238	219		0	1.112	1.78175	-0.624106	0.733721	219		0	5.97	2.32863	-2.56374	0.994822	220		57	307.43	23.5683	-10.6257	1	218		219
1100	Metabolic pathways	Metabolism	1121		0	2.062	1.29608	-1.59095	0.944189	220		0	3.341	2.94268	-1.13536	0.871887	220		8	17.745	3.93108	-2.47896	0.993412	219		209	373.783	13.8044	-11.937	1	219		220
